# Supplementary material
Source: PubMed Central journal article supplement (PMC4998668)
Supplement: supp_mol.116.104174_Supplemental_104174.pdf [file supp_mol.116.104174_Supplemental_104174.pdf]

**Supplemental Data**

**Induction of the UDP-glucuronosyltransferase 1A1 during the perinatal period can cause neurodevelopmental toxicity**

Rika Hirashima, Hirofumi Michimae, Hiroaki Takemoto, Aya Sasaki, Yoshinori Kobayashi, Tomoo Itoh, Robert H. Tukey, and Ryoichi Fujiwara

Department of Pharmaceutics (R.H., T.I., R.F.), Division of Biostatistics (H.M.),  
Department of Pharmacognosy (H.T., Y.K.) School of Pharmacy, Kitasato University,  
5-9-1 Shirokane, Minato-ku, Tokyo 108-8641, JAPAN  
Laboratory of Environmental Toxicology, Department of Pharmacology, University of  
California San Diego, La Jolla, California, United States of America (R.H.T.)

Supplemental Figure: 3

Journal: Molecular Pharmacology

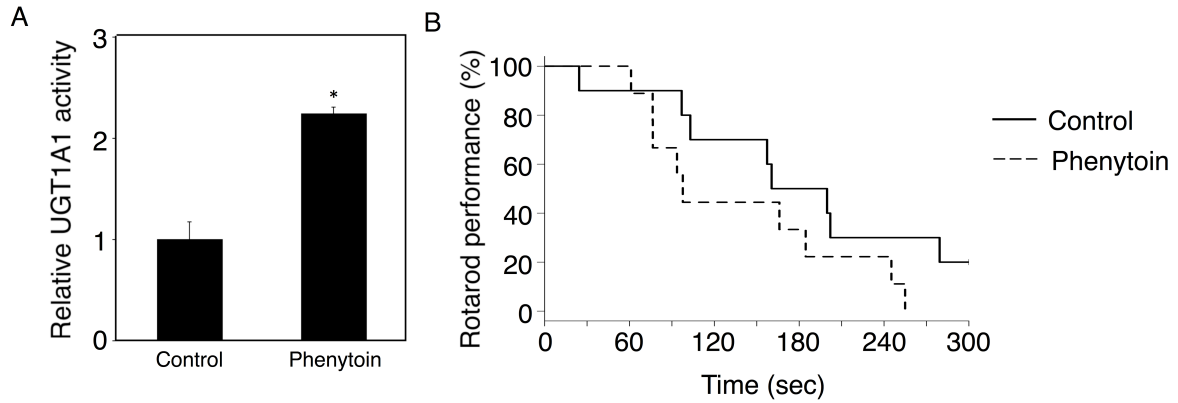

**Supplementary Figure 1. Effects of postnatal phenytoin treatment on UGT1A1 activity and rotarod performance in wild-type mice.** Phenytoin (s.c. 35 mg/kg) was administered to pups daily from postnatal day 1 to day 14. Liver was collected on postnatal day 14. Pooled liver microsomes were prepared from three wild-type mice and UGT1A1 activity toward estradiol was measured (A). On postnatal day 56, rotarod analysis was performed. Prior to the rotarod study, control mice (solid line,  $n = 10$ ) and phenytoin-treated mice (dashed line,  $n = 9$ ) were trained on rotarod at a fixed speed of 6 rpm for 5 minutes. In the rotarod study, the speed of the rotarod was accelerated from 6 to 20 rpm over 5 minutes. The time to fall off the rod was measured (B). Each column is the mean  $\pm$  S.D. of three technical replicates. \*,  $P < 0.05$ .

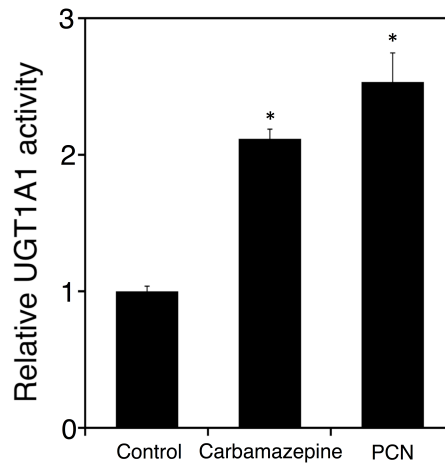

**Supplementary Figure 2. Effects of postnatal phenytoin, carbamazepine, and PCN treatments on UGT1A1 activity in liver microsomes of *hUGT1* mice.** Carbamazepine (35 mg/kg) and PCN (10 mg/kg) were subcutaneously administered to pups daily from postnatal day 11 to day 14. Livers were collected on postnatal day 14 and pooled liver microsomes were prepared from three *hUGT1* mice each. UGT1A1 activity toward estradiol was measured. Each column is the mean  $\pm$  S.D. of three technical replicates. \*,  $P < 0.05$ . PCN, Pregnenolone-16- $\alpha$ -carbonitrile.

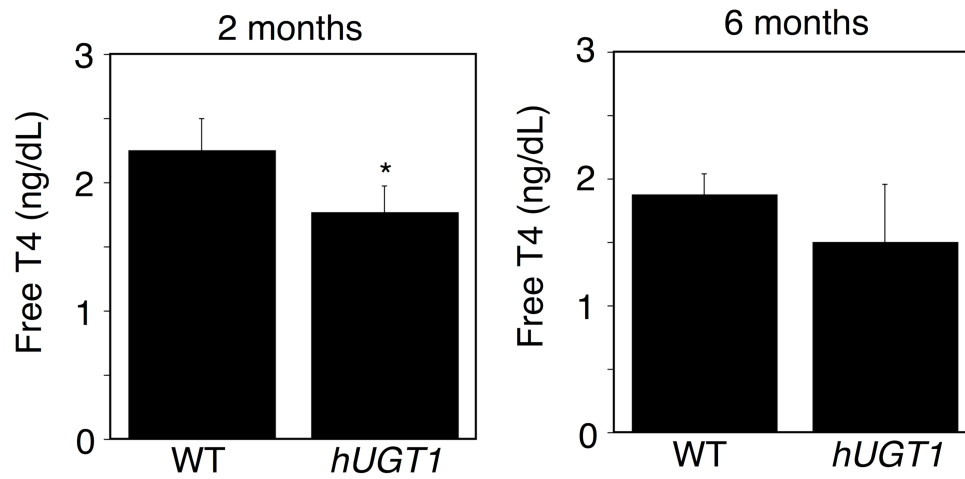

**Supplementary Figure 3. Comparison of free serum T4 levels between wild-type mice and *hUGT1* mice.** Serum free T4 levels and total T4 levels were determined in 2-month-old (left) and 6-month-old (right) wild-type mice (WT) and *hUGT1* mice. Each column is the mean  $\pm$  S.D. of three biological replicates. \*,  $P < 0.05$ .
